# Supplementary material
Source: publisher site journal article supplement (https://www.dovepress.com/article/211974)
Supplement: Supplementary file 1 [file get_supplementary_file.php]

**Improving Longitudinal Transversal Relaxation of Gadolinium Chelate Using** **Silica Coating Magnetite** **Nanoparticles**

Kai Xu1,2,

Heng Liu3,

Junfeng Zhang1,2,

Haipeng Tong1,2,

Zhenghuan Zhao4,

Weiguo Zhang1,2

1.Department of Radiology, Daping Hospital, Army Medical Center of PLA, Army Medical University, Chongqing 400042, China; 2.Chongqing Clinical Research Center for Imaging and Nuclear Medicine, Chongqing 400042, China; 3.Department of Radiology, PLA Rocket Force Characteristic Medical Center, Beijing, 100088, China; 4. Department of Pharmaceutical Engineering, College of Pharmaceutical Sciences, Southwest University, Chongqing 400716, China

**Support Information**

**
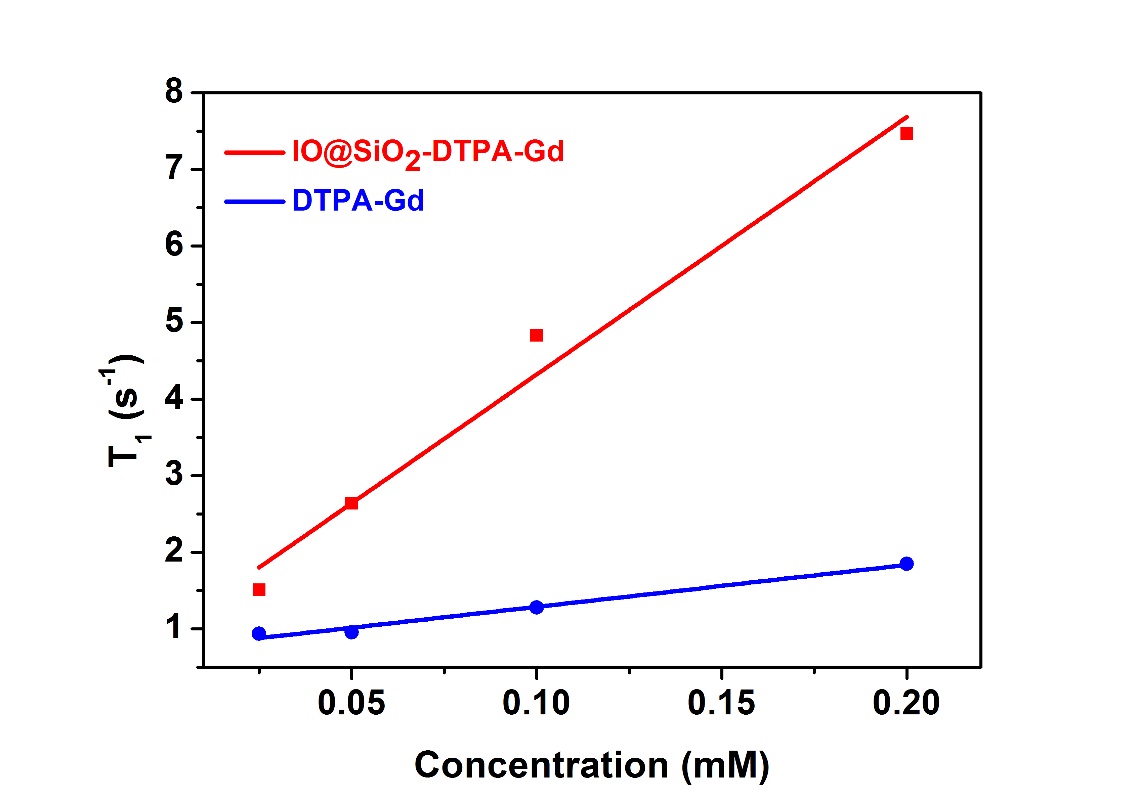
**

**Figure S1 Analyses the *r*1 of IO@SiO2-DTPA-Gd and DTPA-Gd.** The analysis of relaxation rate *R*1 (1/*T*1) vs Gd concentration for IO@SiO2-DTPA-Gd and DTPA-Gd.

**
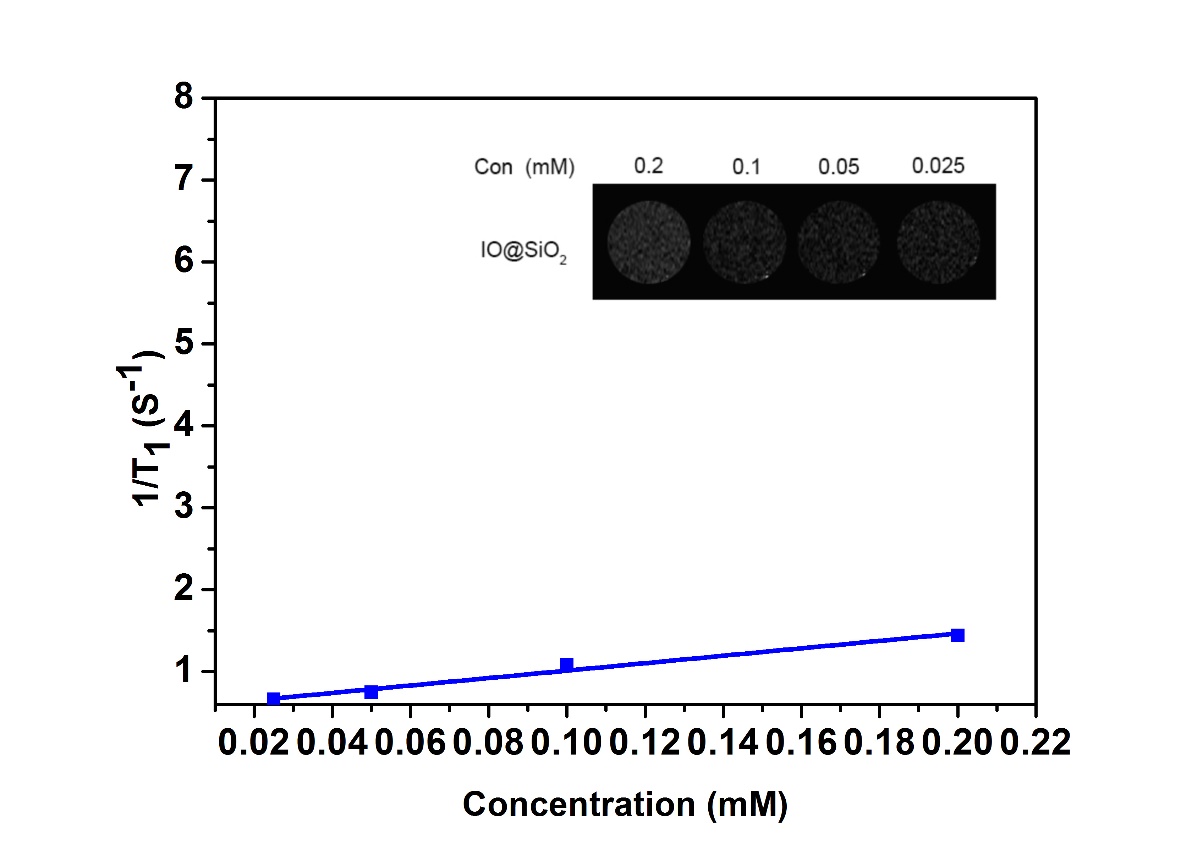
**

**Figure S2 Analyses the *r*1 of IO@SiO2.** The analysis of relaxation rate *R*1 (1/*T*1) vs Fe concentration for IO@SiO2. Insert is T1 MRI phantom studies of IO@SiO2 at different Mn concentrations (mm) in 1% agarose at 0.5 T.

**
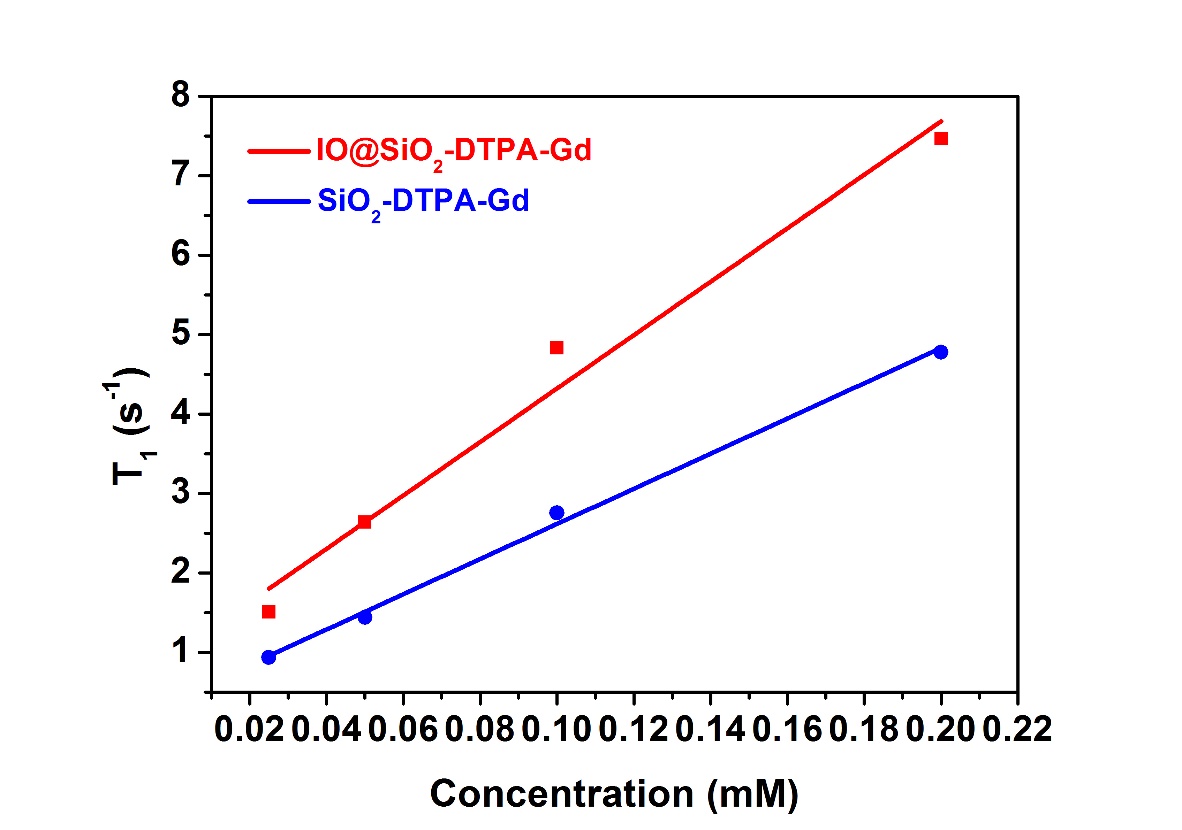
**

**Figure S3 Analyses the *r*1 of IO@SiO2-DTPA-Gd and SiO2-DTPA-Gd.** The analysis of relaxation rate *R*1 (1/*T*1) vs Gd concentration for IO@SiO2-DTPA-Gd and SiO2-DTPA-Gd.

**
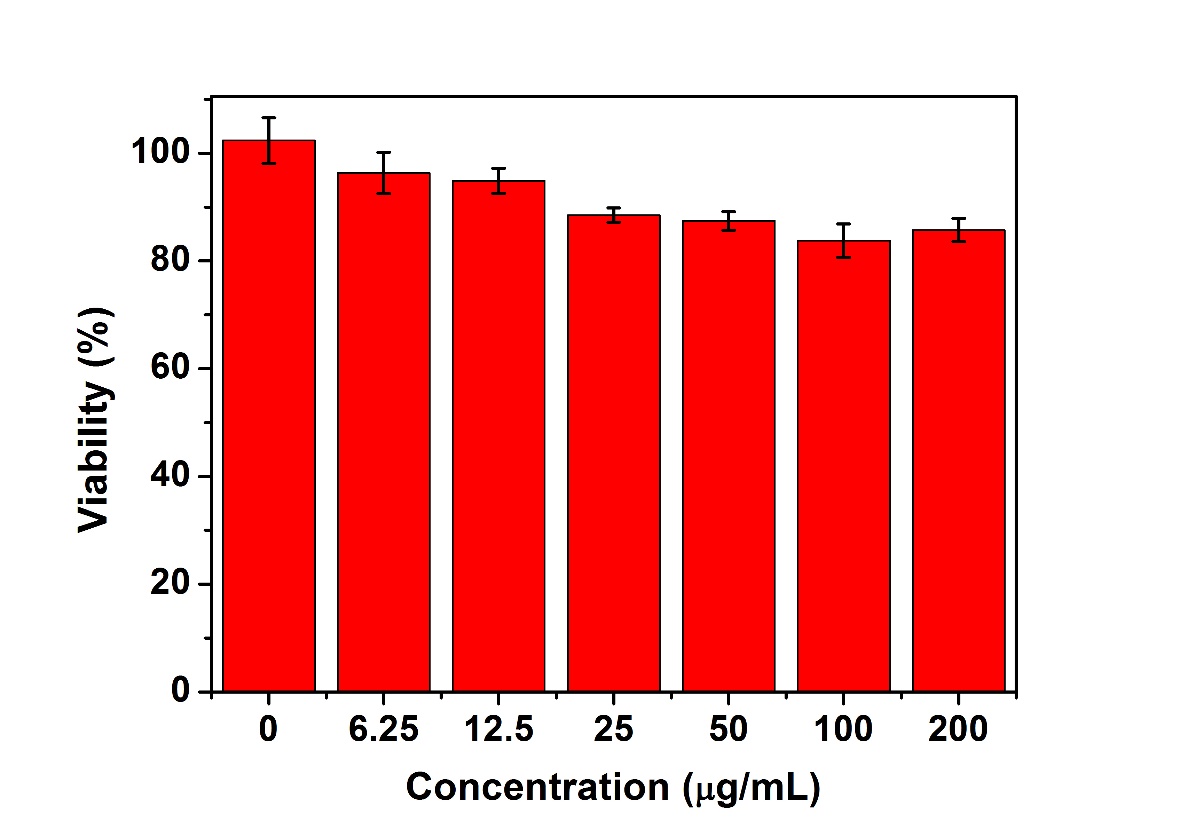
**

**Figure S4 *In vitro* cytotoxicity of IO@SiO2-DTPA-Gd.** The MTT assay of HeLa cells incubated with various concentrations of IO@SiO2-DTPA-Gd for 24 h (*n* = 5/group).


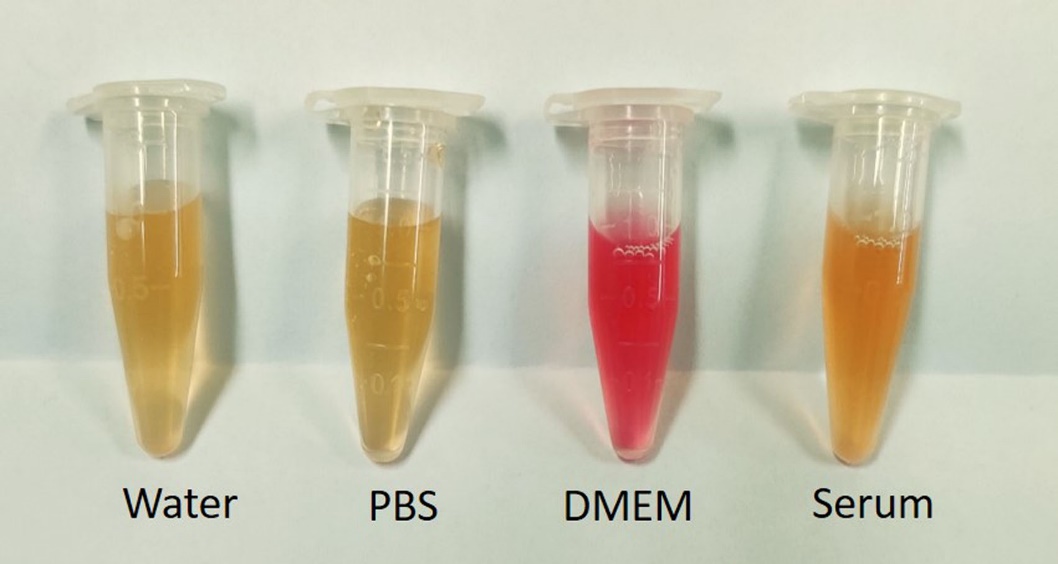


**Figure S5 Stability of IO@SiO2-DTPA-Gd in various solutions at 24 h after incubation.** Neither apparent agglomeration nor precipitation was observed for IO@SiO2-DTPA-Gd NPs after incubation for 24 h in water and different physiological media including PBS buffer, DMEM culture medium, and blood serum.
